# 1 **Quantifying within-host evolution of H5N1 influenza in humans and poultry**

## 2 **in Cambodia**

3  
4 Louise H. Moncla\*<sup>1</sup>, Trevor Bedford<sup>1,2</sup>, Philippe Dussart<sup>3</sup>, Srey Viseth Horm<sup>3</sup>, Sareth Rith<sup>3</sup>,  
5 Philippe Buchy<sup>4</sup>, Erik A Karlsson<sup>3</sup>, Lifeng Li<sup>5,6</sup>, Yongmei Liu<sup>5,6</sup>, Huachen Zhu<sup>5,6</sup>, Yi Guan<sup>5,6</sup>,  
6 Thomas C. Friedrich<sup>7,8</sup>, Paul F. Horwood\*<sup>3,9</sup>

### 7 8 **Author affiliations**

- 9 1. Fred Hutchinson Cancer Research Center, Seattle, Washington, United States.
- 10 2. University of Washington, Seattle, Washington, United States.
- 11 3. Virology Unit, Institut Pasteur du Cambodge, Institut Pasteur International Network, Phnom  
12 Penh, Cambodia.
- 13 4. GlaxoSmithKline, Vaccines R&D, Singapore, Singapore.
- 14 5. Joint Influenza Research Centre (SUMC/HKU), Shantou University Medical College,  
15 Shantou, People's Republic of China.
- 16 6. State Key Laboratory of Emerging Infectious Diseases/Centre of Influenza Research, School  
17 of Public Health, The University of Hong Kong, Hong Kong, SAR, People's Republic of China.
- 18 7. Department of Pathobiological Sciences, University of Wisconsin School of Veterinary  
19 Medicine, Madison, WI, United States.
- 20 8. Wisconsin National Primate Research Center, Madison, WI, United States.
- 21 9. College of Public Health, Medical and Veterinary Sciences, James Cook University,  
22 Townsville, Australia.

23 \* correspondence: [lhmoncla@gmail.com](mailto:lhmoncla@gmail.com) and [paul.horwood@jcu.edu.au](mailto:paul.horwood@jcu.edu.au)

24

25

## 25 **Abstract**

26 Avian influenza viruses (AIVs) periodically cross species barriers and infect humans. The  
27 likelihood that an AIV will evolve mammalian transmissibility depends on acquiring and selecting  
28 mutations during spillover. We analyze deep sequencing data from infected humans and ducks  
29 in Cambodia to examine H5N1 evolution during spillover. Viral populations in both species are  
30 predominated by low-frequency (<10%) variation shaped by purifying selection and genetic drift.  
31 Viruses from humans contain some human-adapting mutations (PB2 E627K, HA A150V, and  
32 HA Q238L), but these mutations remain low-frequency. Within-host variants are not enriched  
33 along phylogenetic branches leading to human infections. Our data show that H5N1 viruses  
34 generate putative human-adapting mutations during natural spillover infection. However, short  
35 infections, randomness, and purifying selection limit the evolutionary capacity of H5N1 viruses  
36 within-host. Applying evolutionary methods to sequence data, we reveal a detailed view of  
37 H5N1 adaptive potential, and develop a foundation for studying host-adaptation in other  
38 zoonotic viruses.

39

## 40 **Introduction**

41 Influenza cross-species transmission poses a continual threat to human health. Since emerging  
42 in 1997, H5N1 avian influenza viruses (AIVs) have caused 860 confirmed infections and 454  
43 deaths in humans<sup>1</sup>. H5N1 naturally circulates in aquatic birds, but some lineages have  
44 integrated into poultry populations. H5N1 is now endemic in domestic birds in some countries<sup>2-4</sup>,  
45 and concern remains that continued human infection may one day facilitate human adaptation.

46

47 The likelihood that an AIV will adapt to replicate and transmit among humans depends  
48 generating and selecting human-adaptive mutations during spillover. Influenza viruses have

49 high mutation rates<sup>5-8</sup>, short generation times<sup>9</sup>, and large populations, and rapidly generate  
50 diversity within-host. Laboratory studies using animal models<sup>10-12</sup> show that only 3-5 amino acid  
51 substitutions may be required to render H5N1 viruses mammalian-transmissible<sup>10-12</sup>, and that  
52 viral variants present at frequencies as low as 5% may be transmitted by respiratory droplets<sup>13</sup>.  
53 Subsequent modeling studies suggest that within-host dynamics are conducive to generating  
54 human-transmissible viruses, but that these viruses may remain at frequencies too low for  
55 transmission<sup>14,15</sup>. Although these studies offer critical insight for H5N1 risk assessment, it is  
56 unclear whether they adequately describe how cross-species transmission proceeds in nature.  
57  
58 H5N1 outbreaks offer rare opportunities to study natural cross-species transmission, but data  
59 are limited. One study of H5N1-infected humans in Vietnam identified mutations affecting  
60 receptor binding, polymerase activity, and interferon antagonism; however, they remained at low  
61 frequencies throughout infection<sup>16</sup>. Recent characterization of H5N1-infected humans in  
62 Indonesia identified novel mutations within-host that enhance polymerase activity in human  
63 cells<sup>17</sup>. Unfortunately, neither of these studies include data from naturally infected poultry, which  
64 would provide a critical comparison for assessing whether infected humans exhibit signs of  
65 adaptive evolution. A small number of studies have examined within-host diversity in  
66 experimentally infected poultry<sup>18-20</sup>, but these may not recapitulate the dynamics of natural  
67 infection.  
68  
69 As part of ongoing diagnostic and surveillance effort, the Institut Pasteur du Cambodge collects  
70 and confirms samples from AIV-infected poultry during routine market surveillance, and from  
71 human cases and poultry during AIV outbreaks. Since H5N1 was first detected in Cambodia in  
72 2004, 56 human cases and 58 poultry outbreaks have been confirmed and many more have

73 gone undetected. Here we analyze previously generated deep sequence data<sup>21</sup> from 8 infected  
74 humans and 5 infected domestic ducks collected in Cambodia between 2010 and 2014. We find  
75 that viral populations in both species are dominated by low-frequency variation, shaped by  
76 purifying selection, population expansion, and genetic drift. We identify a handful of mutations in  
77 humans linked to improved mammalian replication and transmissibility, two of which were  
78 detected in multiple samples, suggesting that adaptive mutations arise during natural spillover  
79 infection. Although most within-host mutations are not linked to human infections on the H5N1  
80 phylogeny, three mutations identified within-host are enriched on phylogenetic branches leading  
81 to human infections. Our data suggest that H5N1 viruses exhibit clear potential for within-host  
82 adaptation, but that a short duration of infection, randomness, and purifying selection may  
83 together limit the evolutionary capacity of these viruses to evolve extensively during any  
84 individual spillover event.

85

## 86 **Methods**

### 87 **Viral sample collection**

88 The Institute Pasteur in Cambodia is a WHO H5 Reference Laboratory (H5RL) and has a  
89 mandate to assist the Cambodian Ministry of Health and the Ministry of Agriculture, Forestry,  
90 and Fisheries in conducting investigations into human cases and poultry outbreaks of H5N1,  
91 respectively. Surveillance for human cases of H5N1 infection is conducted through influenza-  
92 like-illness, severe acute respiratory illness and event-based surveillance in a network of  
93 hospitals throughout the country. Poultry outbreaks of H5N1 are detected through passive  
94 surveillance following reports from farmers and villagers of livestock illness or deaths. The H5RL  
95 conducts confirmation of H5N1 detection and further characterisation (genetic and antigenic) of  
96 H5N1 strains.

97

## 98 **RNA isolation and RT-qPCR**

99 RNA was extracted from swab samples using the QIAmp Viral RNA Mini Kit (Qiagen, Valencia,  
100 CA, USA), following manufacturer's guidelines. Extracts were tested for influenza A (M-gene)  
101 and subtypes H5 (primer sets H5a and H5b), N1, H7, and H9 by using quantitative RT-PCR  
102 (qRT-PCR) using assays sourced from the International Reagent Resource  
103 (<https://www.internationalreagentresource.org/Home.aspx>), as previously outlined<sup>22</sup>. Only  
104 samples with high viral load ( $\geq 10^3$  copies/ $\mu$ l), as assessed by RT-qPCR, were selected for  
105 sequence analysis. All samples were sequenced directly from the original specimen, without  
106 passaging in cell culture or eggs. Information on the samples included in the present analyses  
107 are presented in Table 1.

108

## 109 **cDNA generation and PCR**

110 cDNA was generated using the Superscript IV Reverse Transcriptase (Invitrogen, Carlsbad, CA,  
111 USA) and custom influenza primers targeting the conserved ends. The following primers were  
112 pooled together in a 1.5 : 0.5 : 2.0 : 1.0 ratio: Uni-1.5: ACGCGTGATCAGCAAAGCAGG, Uni-  
113 0.5: ACGCGTGATCAGCGAAAGCAGG, Uni-2.0: ACGCGTGATCAGTAGAAACAAGG, and Uni-  
114 1.0: AGCAAAGCAGG. 1  $\mu$ l of this primer pool were added to 1  $\mu$ l of 10 mM dNTP mix  
115 (Invitrogen) and 11  $\mu$ l of RNA. Contents were briefly mixed and heated for 5 minutes at 65°C,  
116 followed by immediate incubation on ice for at least 1 minute. Next, a second mastermix was  
117 made with 4  $\mu$ l of 5X Superscript IV Buffer, 1  $\mu$ l of 100 mM DTT, 1  $\mu$ l of RNaseOut Recombinant  
118 RNase Inhibitor, and 1  $\mu$ l of SuperScript IV Reverse Transcriptase (200 U/ $\mu$ l) (Invitrogen). 7  $\mu$ l  
119 of mastermix was added to each sample, for a total volume of 20  $\mu$ l. This mixture was briefly  
120 mixed, incubated at 55°C for 20 minutes, then inactivated by incubating at 80°C for 10 minutes.  
121 Amplicons were generated with PCR, with primers targeting the conserved 3' influenza UTRs.

## 122 **Library preparation and sequencing**

123 For each sample, amplicons were pooled in equimolar concentrations for input into the  
124 NEBNext Ultra DNA Library Prep Kit for Illumina (New England BioLabs, Ipswich, MA).  
125 Prepared libraries were pooled in equimolar concentrations to a final concentration of 1 nM, and  
126 run using an Illumina MiSeq Reagent Kit v2 (Illumina, San Diego, CA) for 500 cycles (2 x 250  
127 bp). Demultiplexed files were output in FASTQ format.

128

## 129 **Processing of raw sequence data, mapping, and variant calling**

130 Human reads were removed from raw FASTQ files by mapping to the human reference genome  
131 GRCH38 with bowtie2<sup>24</sup> version 2.3.2 (<http://bowtie-bio.sourceforge.net/bowtie2/index.shtml>).  
132 Reads that did not map to human genome were output to separate FASTQ files and used for all  
133 subsequent analyses. Illumina data was analyzed using the pipeline described in detail at  
134 [https://github.com/lmoncla/illumina\\_pipeline](https://github.com/lmoncla/illumina_pipeline). Briefly, raw FASTQ files were trimmed using  
135 Trimmomatic<sup>23</sup> (<http://www.usadellab.org/cms/?page=trimmomatic>), trimming in sliding windows  
136 of 5 base pairs and requiring a minimum Q-score of 30. Reads that were trimmed to a length of  
137 <100 base pairs were discarded. Trimming was performed with the following command: java -jar  
138 Trimmomatic-0.36/trimmomatic-0.36.jar SE input.fastq output.fastq SLIDINGWINDOW:5:30  
139 MINLEN:100. Trimmed reads were mapped to consensus sequences previously derived<sup>21</sup> using  
140 bowtie2<sup>24</sup> version 2.3.2 (<http://bowtie-bio.sourceforge.net/bowtie2/index.shtml>), using the  
141 following command: bowtie2 -x reference\_sequence.fasta -U  
142 read1.trimmed.fastq,read2.trimmed.fastq -S output.sam --local. Duplicate reads were removed  
143 with Picard (<http://broadinstitute.github.io/picard/>) with: java -jar picard.jar MarkDuplicates  
144 I=input.sam O=output.sam REMOVE\_DUPLICATES=true. Mapped reads were imported into  
145 Geneious (<https://www.geneious.com/>) for visual inspection and consensus calling, with  
146 nucleotide sites with <100x coverage called as Ns. To avoid issues with mapping to an improper

147 reference sequence, we then remapped each sample's trimmed FASTQ files to its own  
148 consensus sequence. These bam files were again manually inspected in Geneious, and a final  
149 consensus sequence was called. We were able to generate full-genome data for all samples  
150 except for A/Cambodia/X0128304/2013, for which we were lacked data for PB1. These BAM  
151 files were then exported and converted to mpileup files with samtools<sup>25</sup>  
152 (<http://samtools.sourceforge.net/>), and within-host variants were called using VarScan<sup>26,27</sup>  
153 (<http://varscan.sourceforge.net/>). For a variant to be reported, we required the variant site to be  
154 sequenced to a depth of at least 100x with a mean quality of Q30, and for the variant to be  
155 detected in both forward and reverse reads at a frequency of at least 1%. We called variants  
156 using the following command: `java -jar VarScan.v2.3.9.jar mpileup2snp input.pileup --min-  
157 coverage 100 --min-avg-qual 30 --min-var-freq 0.01 --strand-filter 1 --output-vcf 1 > output.vcf.`  
158 VCF files were parsed and annotated with coding region changes using custom software  
159 available here ([https://github.com/blab/h5n1-  
160 cambodia/blob/master/scripts/H5N1\\_vcf\\_parser.py](https://github.com/blab/h5n1-cambodia/blob/master/scripts/H5N1_vcf_parser.py)). All amino acid changes for HA are reported  
161 and plotted using native H5 numbering, including the signal peptide, which is 16 amino acids in  
162 length. For ease of comparison, some amino acid changes are also reported with mature H5  
163 peptide numbering in the manuscript when indicated, and in **Table 2**.

164

#### 165 **General availability of analysis software and data**

166 All code used to analyze data and generate figures for this manuscript are publicly available at  
167 <https://github.com/blab/h5n1-cambodia>. Raw FASTQ files with human reads removed are  
168 available under SRA accession number PRJNA547644, and accessions SRX5984186-  
169 SRX5984198. All reported variant calls and phylogenetic trees are available at  
170 <https://github.com/blab/h5n1-cambodia/tree/master/data>.

171

## 172 **Phylogenetic reconstruction**

173 We downloaded all currently available H5N1 genomes from the EpiFlu Database of the Global  
174 Initiative for Sharing All Influenza Data<sup>28,29</sup> (GISAID, <https://www.gisaid.org/>) and all currently  
175 available full H5N1 genomes from the Influenza Research Database (IRD,  
176 <http://www.fludb.org>)<sup>30</sup> and added consensus genomes from our 5 duck samples and 8 human  
177 samples. Sequences and metadata were cleaned and organized using fauna  
178 (<https://github.com/nextstrain/fauna>), a database system part of the Nextstrain platform.  
179 Sequences were then processed using Nextstrain's augur software<sup>31</sup>  
180 (<https://github.com/nextstrain/augur>). Sequences were filtered by length to remove short  
181 sequences using the following length filters: PB2: 2100 bp, PB1: 2100 bp, PA: 2000 bp, HA:  
182 1600 bp, NP: 1400 bp, NA: 1270 bp, MP: 900 bp, and NS: 800 bp. We excluded sequences with  
183 sample collection dates prior to 1996, and those for which the host was annotated as laboratory  
184 derived, ferret, or unknown. We also excluded sequences for which the country or geographic  
185 region was unknown. Sequences for each gene were aligned using MAFFT<sup>32</sup>, and then trimmed  
186 to the reference sequence. We chose the A/Goose/Guangdong/1/96(H5N1) genome (GenBank  
187 accession numbers: AF144300-AF144307) as the reference genome. IQTREE<sup>33,34</sup> was then  
188 used to infer a maximum likelihood phylogeny, and TreeTime<sup>35</sup> was used to infer a molecular  
189 clock and temporally-resolved phylogeny. Tips which fell outside of 4 standard deviations away  
190 from the inferred molecular clock were removed. Finally, TreeTime<sup>35</sup> was used to infer ancestral  
191 sequence states at internal nodes and the geographic migration history across the phylogeny.  
192 We inferred migration among 9 defined geographic regions, China, Southeast Asia, South Asia,  
193 Japan and Korea, West Asia, Africa, Europe, South America, and North America. Our final trees  
194 are available at <https://github.com/blab/h5n1-cambodia/tree/master/data/tree-jsons>, and include



195 the following number of sequences: PB2: 4063, PB1: 3867, PA: 4082, HA: 6431, NP: 4070, NA:  
196 5357, MP: 3940, NS: 3678. Plotting was performed using baltic  
197 (<https://github.com/evogytis/baltic>).

198

### 199 **Diversity analyses**

200 Within-host variants were called as described above, requiring a minimum coverage of 100x, a  
201 minimum frequency of 1%, a minimal base quality score of Q30, and detection on both forward  
202 and reverse reads. Variants were annotated as nonsynonymous or synonymous. For each  
203 sample, we computed the number of synonymous and nonsynonymous sites for each coding  
204 region with SNPGenie<sup>36,37</sup> (<https://github.com/chasewnelson/SNPGenie>). For each sample and  
205 coding region, we then computed  $\pi_N$  as the number of nonsynonymous mutations per  
206 nonsynonymous site, and  $\pi_S$  as the number of synonymous mutations per synonymous site.  
207 Bars shown in **Fig. 1c** and values in **Supplementary Table 1** depict mean  $\pi_N$  (dark colors) or  $\pi_S$   
208 (light colors) when values were combined across all humans (red bars) or ducks (blue bars).  
209 Error bars represent the standard deviations.

210

### 211 **Comparison to functional sites**

212 We used the Sequence Feature Variant Types tool from the Influenza Research  
213 Database<sup>30</sup> to download all currently available annotations for H5 hemagglutinins, N1  
214 neuraminidases, and all subtypes for the remaining gene segments. We then annotated each  
215 within-host SNV identified in our dataset that fell within an annotated region or site. The  
216 complete results of this annotation are available in **Supplementary Table 2**. We next filtered  
217 our annotated SNVs to include only those located in sites involved in “host-specific” functions or  
218 interactions, i.e., those that are distinct between human and avian hosts. We defined host-  
219 specific functions/interactions as receptor binding, interaction with host cellular machinery,

220 nuclear import and export, immune antagonism, 5' cap binding, temperature sensitivity, and  
221 glycosylation. We also included sites that have been phenotypically identified as determinants of  
222 transmissibility and virulence. Sites that participate in binding interactions with other viral  
223 subunits or vRNP, conserved active site domains, drug resistance mutations, and epitope sites  
224 were not categorized as host-specific for this analysis. We annotated both synonymous and  
225 nonsynonymous mutations in our dataset, but only highlight nonsynonymous changes in **Fig. 2**  
226 and **Table 2**.

227

### 228 **Shared sites permutation test**

229 To test whether humans or duck samples shared more polymorphisms than expected by  
230 chance, we performed a permutation test. We first counted the number of sites,  $n$ , in which an  
231 SNV altered amino acid used, across coding regions and samples. For example, if two SNVs  
232 occurred in the same codon site, we counted this as 1 variable amino acid site. Next, for each  
233 gene and sample, we calculated the number of amino acid sites that were covered with with  
234 sufficient sequencing depth that a mutation could have been called using our SNV calling  
235 criteria. To do this, we calculated the length in amino acids of each coding region,  $L$ , that was  
236 covered by at least 100 reads. Non-coding regions were not included. For each coding region  
237 and sample, we then simulated the effect of having  $n$  variable amino acid sites placed randomly  
238 along the coding region between sites 1 to  $L$ , and recorded the site where the polymorphism  
239 was placed. After simulating this for each gene and sample, we counted the number of sites that  
240 were shared between at least 2 human or at least 2 duck samples. This process was repeated  
241 100,000 times. The number of shared polymorphisms at each iteration was used to generate a  
242 null distribution, as shown in **Fig. 3b**. We calculated p-values as the number of iterations for  
243 which there were at least as many shared sites as observed in our actual data, divided by

244 100,000. For the simulations displayed in **Fig. 3c** and **Fig. 3d**, we wanted to simulate the effect  
245 of genomic constraint, meaning that only some fraction of the genome could tolerate mutation.  
246 For these analyses, simulations were done exactly the same, except that the number of sites at  
247 which a mutation could occur was reduced to 70% (**Fig. 3c**) or 50% (**Fig. 3d**). Code for  
248 performing the shared sites permutation test is freely available at [https://github.com/blab/h5n1-](https://github.com/blab/h5n1-cambodia/blob/master/figures/figure-5b-shared-sites-permutation-test.ipynb)  
249 [cambodia/blob/master/figures/figure-5b-shared-sites-permutation-test.ipynb](https://github.com/blab/h5n1-cambodia/blob/master/figures/figure-5b-shared-sites-permutation-test.ipynb).

250

### 251 **Reconstruction of host transitions along the phylogeny**

252 We used the phylogenetic trees in **Supplementary Figure 2** to infer host transitions along each  
253 gene's phylogeny. As described above, we used TreeTime<sup>35</sup> to reconstruct ancestral nucleotide  
254 states at each internal node and infer amino acid mutations along each branch along these  
255 phylogenetic trees. We then classified host transition mutations along branches that lead to  
256 human or avian tips as follows (**Fig. 4a**). For each branch in the phylogeny, we enumerated all  
257 tips descending from that branch. If all descendent tips were human, we considered this a  
258 monophyletic human clade. If the current branch's ancestral node also led to only human  
259 descendants, we labelled the current branch a "human-to-human" branch. If a branch leading to  
260 a monophyletic human clade had an ancestral node that included avian and human  
261 descendants, then we considered the current branch a "avian-to-human" branch. All other  
262 branches were considered "avian-to-avian" branches. We did not explicitly allow for human-to-  
263 avian branches in this analysis. Because avian sampling is poor relative to human sampling,  
264 and because H5N1 circulation is thought to be maintained by transmission in birds, we chose to  
265 only label branches explicitly leading to human infections as human branches. We also  
266 reasoned that for instances in which a human tip appears to be ancestral to an avian clade, this  
267 more likely results from poor avian sampling than from true human-to-avian transmission. Using

268 these criteria, we then gathered the inferred amino acid mutations that occurred along each  
269 branch in the phylogeny, and counted the number of times they were associated with each type  
270 of host transition. We then queried each SNV detected within-host in our dataset, in both human  
271 and duck samples, to determine the number of host transitions that they occurred on in the  
272 phylogeny, as shown in **Fig. 4b**. For ease of plotting and viewing, we combined counts for avian  
273 to human and human-to-human transitions. To test whether individual mutations were enriched  
274 along branches leading to human infections, we performed Fisher's exact tests comparing the  
275 number of avian-to-avian and avian/human-to-human transitions along which the mutation was  
276 detected vs. the overall number of avian-to-avian and avian/human-to-avian transitions that  
277 were observed along the tree. Mutations that showed statistically significant enrichment are  
278 annotated in **Fig. 4b**.

279

## 280 **Results**

### 281 **Sample selection and dataset information**

282 We analyzed full-genome sequence data from primary, influenza-confirmed samples from  
283 infected humans and domestic ducks from Cambodia (**Table 1**). Four domestic duck samples  
284 (pooled organs) were collected as part of poultry outbreak investigations, while one was  
285 collected during live bird market surveillance (pooled throat and cloacal swab). All human  
286 samples (throat swabs) were collected via event-based surveillance upon admittance to various  
287 hospitals throughout Cambodia<sup>21</sup>. Because of limited sample availability and long storage  
288 times, generating duplicate sequence data for each sample was not possible. We therefore  
289 focused on samples whose viral RNA copy numbers were  $\geq 10^3$  copies/ $\mu$ l as assessed by RT-  
290 qPCR (**Table 1**), and whose mean coverage depth exceeded 100x (**Supplementary Figure 1**).

291 We analyzed full genome data for 7 human and 5 duck samples, and near complete genome  
292 data for A/Cambodia/X0128304/2013, for which we lack data from the PB1 gene.  
293  
294 H5 viruses circulating in Cambodia were exclusively clade 1.1.2<sup>4</sup> until 2013, when a novel  
295 reassortant virus emerged<sup>38</sup>. This reassortant virus expressed a hemagglutinin (HA) and  
296 neuraminidase (NA) from clade 1.1.2, with internal genes from clade 2.3.2.1a<sup>21</sup>. All 2013/2014  
297 samples in our dataset come from this outbreak, while samples collected prior to 2013 are clade  
298 1.1.2 (**Table 1** and **Supplementary Figure 2**). The 2013 reassortant viruses share 4 amino acid  
299 substitutions in HA, S123P, S133A, S155N, and K266R<sup>21</sup> (H5, mature peptide numbering).  
300 S133A and S155N have been linked to improved  $\alpha$ -2,6 linked sialic acid binding, independently  
301 and in combination with S123P<sup>39-41</sup>. All samples encode a polybasic cleavage site in HA  
302 (XRRKRR) between amino acids 325-330 (H5, mature peptide numbering), a virulence  
303 determinant for H5N1 AIVs<sup>42,43</sup>, and a 20 amino acid deletion in NA. This NA deletion is a well-  
304 documented host range determinant<sup>44-47</sup>.  
305  
306 Using this subset of 8 human and 5 duck samples, we aimed to determine whether positive  
307 selection would promote adaptation in humans. Positive selection increases the frequency of  
308 beneficial variants, and is often identified by tracking mutations' frequencies over time. While  
309 multiple time points were not available in our dataset, all human samples were collected 5-12  
310 days after reported symptom onset<sup>21</sup>. Animal infection studies have observed drastic changes in  
311 within-host variant frequencies in 3-7 days<sup>11,13</sup>, suggesting that 5-12 days post symptom onset  
312 may provide sufficient time to observe within-host evolution. We reasoned that strong within-  
313 host positive selection should result in the following patterns: (1) Positive selection should  
314 increase the frequencies of human-adaptive mutations during human infection. Therefore, viral

315 populations in humans should exhibit more high-frequency polymorphisms, and a higher mean  
316 variant frequency, than viral populations in ducks. (2) Viruses in humans should harbor  
317 mutations phenotypically linked to mammalian adaptation. (3) Viruses in humans should exhibit  
318 evidence for convergent evolution, i.e., the same mutation arising across multiple samples. (4)  
319 Variants arising within humans should be enriched among viruses leading to human infections  
320 on the H5N1 phylogeny.

321

### 322 **Purifying selection predominates in humans and ducks**

323 We called within-host variants across the genome that were present in  $\geq 1\%$  of sequencing  
324 reads and occurred at a site with a minimum read depth of 100x and a minimum quality score of  
325 Q30 (see Methods for details). All coding region changes are reported using native H5  
326 numbering, including the signal peptide, unless otherwise noted. Most single nucleotide variants  
327 (SNVs) were present at low frequencies (**Fig. 1a**). We identified a total of 198 SNVs in humans  
328 (111 nonsynonymous, 91 synonymous, 4 missense) and 40 in ducks (16 nonsynonymous, 23  
329 synonymous, 1 missense). Human samples had more SNVs than duck samples on average  
330 (mean SNVs per sample: humans =  $26 \pm 19$ , ducks =  $8 \pm 3$ ,  $p = 2.79 \times 10^{-17}$ , Fisher's exact test),  
331 although the number of SNVs per sample was variable among samples in both species  
332 (**Supplementary Figure 3**). To determine whether humans had more high-frequency variants  
333 than ducks, we generated a site frequency spectrum (**Fig. 1b**). Purifying selection removes new  
334 variants from the population, generating an excess of low-frequency variants, while positive  
335 selection promotes accumulation of high-frequency polymorphisms. Exponential population  
336 expansion also causes excess low-frequency variation; however, while selection  
337 disproportionately affects nonsynonymous variants, demographic factors affect synonymous  
338 and nonsynonymous variants equally. In both humans and ducks, over 80% of variants (both

339 synonymous and nonsynonymous) were present in <10% of the population, and the distribution  
340 of SNV frequencies were strikingly similar (**Fig. 1b**). The mean SNV frequency in human (5.8%)  
341 and duck samples (6.6%) were not statistically different ( $p=0.11$ , Mann Whitney U test).

342

343 Comparing nonsynonymous ( $\pi_N$ ) and synonymous ( $\pi_S$ ) polymorphism in a population is another  
344 common measure for selection. An excess of synonymous polymorphism ( $\pi_N/\pi_S < 1$ ) indicates  
345 purifying selection, an excess of nonsynonymous variation ( $\pi_N/\pi_S > 1$ ) suggests positive  
346 selection, and approximately equal rates ( $\pi_N/\pi_S \sim 1$ ) suggest that genetic drift is the predominant  
347 force shaping diversity. We calculated the number of synonymous and nonsynonymous variants  
348 for each gene in each sample, and normalized these counts to the number of synonymous and  
349 nonsynonymous sites. In both species, most genes exhibited  $\pi_N < \pi_S$ , although there was  
350 substantial variation among samples (**Supplementary Table 1** and **Fig. 1c**). The difference  
351 between  $\pi_S$  and  $\pi_N$  was generally not statistically significant (**Supplementary Table 1**). The  
352 exception was human M2 ( $\pi_N = 0.0028$ ,  $\pi_S = 0$ ,  $p = 0.049$ , paired t-test) and NA ( $\pi_N/\pi_S = 0.21$ ,  $p$   
353  $= 0.033$ , paired t-test), which exhibited evidence of purifying selection. When diversity estimates  
354 across all genes were combined, both species exhibited  $\pi_N/\pi_S < 1$  (**Fig. 1c**) (human  $\pi_N/\pi_S = 0.41$ ,  
355  $p = 0.00028$ , unpaired t-test; duck  $\pi_N/\pi_S = 0.29$ ,  $p = 0.022$ , unpaired t-test). Taken together, our  
356 data suggest that H5N1 within-host populations in both humans and ducks are broadly shaped  
357 by a combination of purifying selection, population growth, and genetic drift. We do not find  
358 evidence for widespread positive selection in any individual coding region.

359

### 360 **SNVs are identified in humans at functionally relevant sites**

361 Influenza phenotypes can be drastically altered by single amino acid changes. We took  
362 advantage of the Influenza Research Database<sup>29</sup> Sequence Feature Variant Types tool, a

363 catalogue of amino acids critical to protein structure and function and experimentally linked to  
364 functional alteration. We downloaded all available annotations for H5 HAs, N1 NAs, and all  
365 subtypes for the remaining proteins, and annotated each mutation in our dataset that fell within  
366 an annotated region (**Supplementary Table 2**). We then filtered these annotated amino acids to  
367 include only those located in sites involved in host-specific functions (see Methods for details).  
368  
369 Of the 218 unique, polymorphic amino acid sites in our dataset, we identified 34  
370 nonsynonymous mutations at sites involved in viral replication, receptor binding, virulence, and  
371 interaction with host cell machinery (**Fig. 2**). Some sites are explicitly linked to H5N1  
372 mammalian adaptation (**Table 2**). PB2 E627K was detected as a minor variant in  
373 A/Cambodia/W0112303/2012, and in A/Cambodia/V0417301/2011 at consensus. A lysine at  
374 position 627 is a conserved marker of human adaptation<sup>47,48</sup> that enhances H5N1 replication in  
375 mammals<sup>11,12,47,49</sup>. A/Cambodia/W0112303/2012 also encoded PB2 D701N at consensus.  
376 Curiously, this patient also harbored the reversion mutation, N701D, at low-frequency within-  
377 host. An asparagine (N) at PB2 701 enhances viral replication and transmission in  
378 mammals<sup>50,51</sup>, while an aspartate (D) is commonly identified in birds. We cannot distinguish  
379 whether the founding virus harbored an asparagine or aspartate, so our data are consistent with  
380 two possibilities: transmission of a virus harboring asparagine and within-host generation of  
381 aspartate; or, transmission of a virus with aspartate followed by within-host selection but  
382 incomplete fixation of asparagine. All other human and avian samples in our dataset encoded  
383 the “avian-like” amino acids, glutamate at PB2 627, and aspartate at PB2 701. None of the  
384 adaptive polymerase mutations that recently identified by Welkers et al.<sup>17</sup> in H5N1-infected  
385 humans in Indonesia were present in our samples, nor were any of the human-adaptive  
386 mutations identified in a recent deep mutational scan of PB2<sup>52</sup>.



387

388 We also identified HA mutations linked to human receptor binding. Two human samples  
389 encoded an HA A150V mutation (134 in mature, H5 peptide numbering, **Fig. 2**). A valine at HA  
390 150 improves  $\alpha$ -2,6 linked sialic acid binding in H5N1 viruses<sup>53,54</sup>, and was also identified in  
391 H5N1-infected humans in Vietnam<sup>16</sup>. Finally, HA Q238L was detected in  
392 A/Cambodia/V0417301/2011 and A/Cambodia/V0401301/2011. HA 238L (222 in mature, H5  
393 peptide numbering) was shown in H5N1 transmission studies to confer a switch from  $\alpha$ -2,3 to  $\alpha$ -  
394 2,6 linked sialic acid binding<sup>11</sup> and mediate transmission<sup>11,12</sup>. An HA Q238R mutation was  
395 identified in A/Cambodia/X0125302/2013, although nothing is known regarding an arganine (R)  
396 at this site.

397

398 Mutations annotated as host-specific were not detected at higher frequencies than non-host-  
399 specific mutations (mean frequency for host-specific mutations = 6.8%  $\pm$  7.5%, mean frequency  
400 for non-host-specific mutations = 5.5%  $\pm$  5.4%, p-value = 0.129, unpaired t-test). All 8 human  
401 samples harbored at least 1 mutant in a host-specific site. Critically though, the functional  
402 impacts of influenza mutations strongly depend on sequence context<sup>55</sup>, and we did not  
403 phenotypically test these mutations. We caution that confirming functional impacts for these  
404 mutations would require further study. Still, our data show that putative human-adapting  
405 mutations are generated during natural spillover. Our results also highlight that even mutations  
406 that have been predicted to be strongly beneficial (e.g., PB2 627K and HA 238L) may remain at  
407 low frequencies in vivo.

408

409 **Shared diversity is limited**

410 Each human H5N1 infection is thought to represent a unique avian spillover event. If selection is  
411 strong at a given site in the genome, then mutations may arise at that site independently across  
412 multiple patients. We identified 13 amino acid sites in our dataset that were polymorphic in at  
413 least 2 samples, 4 of which were detected in both species (PB1 371, PA 307, HA 265 and NP  
414 201). Of the 34 unique polymorphic amino acid sites in ducks, 3 sites were shared by at least 2  
415 duck samples; of the 188 unique polymorphic amino acid sites in humans, 9 were shared by at  
416 least 2 human samples (**Fig. 3a**). Two of these shared sites, HA 150 and HA 238, are linked to  
417 human-adapting phenotypes (**Table 2**). To determine whether the number of shared sites we  
418 observe is more or less than expected by chance, we performed a permutation test. For each  
419 species, we simulated datasets with the same number of sequences and amino acid  
420 polymorphisms as our actual dataset, but assigned each polymorphism to a random amino acid  
421 site. For each iteration, we then counted the number of polymorphic sites that were shared by  
422  $\geq 2$  samples. We ran this simulation for 100,000 iterations for each species, and used the  
423 number of shared sites per iteration to generate a null distribution (**Fig. 3b**, colored bars).  
424 Comparison to the observed number of shared sites (3 and 9, dashed lines in **Fig. 3b**),  
425 confirmed that humans share slightly more polymorphisms than expected by chance ( $p =$   
426 0.046), while ducks share significantly more ( $p = 0.00006$ ).

427

428 Viral genomes are highly constrained<sup>56</sup>, which could account for the convergence we observe.

429 To test this, we repeated our simulations to restrict the number of amino acid sites that could  
430 tolerate a mutation to 70% or 50%. When 70% of the coding region was permitted to mutate,  
431 ~23% of simulations resulted in  $\geq 9$  shared sites in humans ( $p = 0.23$ ), and when 50% of the  
432 genome was permitted to mutate, ~61% of simulations resulted in  $\geq 9$  shared sites ( $p = 0.608$ ).

433 In contrast, the probability of observing 3 shared sites among duck samples remained low

434 regardless of genome constraint (70% of genome tolerates mutation:  $p = 0.00014$ ; 50% of  
435 genome tolerates mutation:  $p = 0.00051$ ), suggesting a significant, although low, level of  
436 convergence. Our results suggest that the shared sites we observe in humans could be  
437 explained by genome constraint. However, given the presence of functionally relevant shared  
438 polymorphisms in humans, we speculate that the shared diversity we observe reflects a  
439 combination of host-specific positive selection at isolated sites, amongst a background of  
440 genomic constraint.

441

#### 442 **Within-host SNVs are not enriched on spillover branches**

443 If within-host mutations are human-adapting, then those mutations should be enriched among  
444 H5N1 viruses that have caused human infections in the past. To test this hypothesis, we  
445 inferred full genome phylogenies using all available full-genome H5N1 viruses from the  
446 EpiFlu<sup>28,29</sup> and IRD<sup>30</sup> databases (**Supplementary Figure 2**), reconstructed ancestral nucleotide  
447 states at each internal node, and inferred amino acid mutations along each branch. We then  
448 classified host transition mutations along branches that led to human or avian tips (**Fig. 4a**). If a  
449 branch fell within a clade that included only human tips, that branch was labelled as a human-to-  
450 human transition. If a branch led to a human-only clade but its ancestral branch included avian  
451 descendants, this was labelled as an avian-to-human transition. All other transitions were  
452 labelled avian-to-avian (**Fig. 4a**, see Methods for more details). We then curated the mutations  
453 that occurred on each type of host transition, and compared these counts to the mutations  
454 identified within-host in our dataset.

455

456 Of the 120 nonsynonymous within-host SNVs we identified in our dataset, 60 (50%) were not  
457 detected in the phylogeny at all. This suggests that many of the mutations generated within-host

458 are likely deleterious, and are purged from the H5N1 population over time. Additionally, because  
459 humans are generally dead-end hosts for H5N1, even human-adapting variants arising within-  
460 host are likely to be lost due to terminal human transmission chains. Of the within-host  
461 mutations that were detected on the phylogeny, most occurred on branches leading to avian  
462 infections (**Fig 4b**, blue bars). However, there were a few exceptions (**Fig 4b**, red bars). Across  
463 the phylogeny, we enumerated a total of 31,939 avian-to-avian transitions, and 2,787  
464 human/avian-to-human transitions, so that we expect a 11.46:1 ratio of avian-to-avian  
465 transitions relative to human/avian-to-human transitions. In contrast, PB2 E627K was heavily  
466 enriched among human infections, detected on 15 avian-to-avian transitions and 36  
467 human/avian-to-human transitions ( $p = 4.21 \times 10^{-28}$ , Fisher's exact test). HA A150V was  
468 detected in only one avian-to-avian transition, but in 8 human/avian-to-human transitions ( $p =$   
469  $1.46 \times 10^{-8}$ , Fisher's exact test), and HA N198S was detected on 4 avian-to-avian transitions  
470 and 3 avian-to-human transitions ( $p = 0.014$ , Fisher's exact test). Although nothing is known  
471 regarding a serine at HA 198, a lysine at that site can confer  $\alpha$ -2,6-linked sialic acid binding<sup>39,57</sup>.  
472 Taken together, these data suggest that the majority of mutations detected within-host are not  
473 associated with human spillover. However, they agree with selection for human-adapting  
474 phenotypes at a small subset of sites (PB2 E627K, HA A150V, HA N198S).

475

## 476 **Discussion**

477 Our study utilizes a unique dataset of to quantify how viruses H5N1 evolve during natural  
478 spillover infection. We find that purifying selection, population growth, and genetic drift broadly  
479 shape viral diversity in both hosts. Half of the within-host variants identified within-host are never  
480 detected in the H5N1 phylogeny and are likely deleterious. We detect putative human-adapting  
481 mutations (PB2 E627K, HA A150V, and HA Q238L) during human infection, two of which arose

482 multiple times. PB2 E627K and HA A150V are enriched along phylogenetic branches leading to  
483 human infections, supporting their potential role in human adaptation. Our data show that during  
484 spillover, H5N1 viruses have the capacity to generate well-known markers of mammalian  
485 adaptation in multiple, independent hosts. However, they also highlight that within-host diversity  
486 is shaped heavily by purifying selection and randomness as these markers do not reach high-  
487 frequency during a single spill-over human infection. We speculate that during spillover, short  
488 infection times, randomness, and purifying selection may together limit the capacity of H5N1  
489 viruses to evolve within-host.

490

491 Although data from spillovers are limited, our results align with data from Vietnam<sup>16</sup> and  
492 Indonesia<sup>17</sup>. Welkers et al.<sup>17</sup> identified markers of mammalian replication (PB2 627K) and  
493 transmission (HA 220K) in humans, but found that adaptive markers were not widespread.  
494 Welkers et al. also characterized new mutations that improved human replication, suggesting  
495 that there are yet undiscovered pathways for adaptation. Imai et al.<sup>16</sup> characterized SNVs in  
496 H5N1-infected humans that altered viral replication, receptor binding, and interferon  
497 antagonism, but these mutations stayed at low frequencies. Imai et al. also showed that most  
498 within-host variants elicited neutral or deleterious effects on protein function in humans, aligning  
499 with the widespread purifying selection we detect within-host, and the absence of ~50% of  
500 within-host variants in the phylogeny. These findings also agree with predictions by Russell et  
501 al.<sup>14</sup>, who hypothesized that H5N1 viruses would generate human-adapting mutations during  
502 infection, but that these mutations would remain at low frequencies and fail to be transmitted.

503

504 One unexpected result is that mutations that hypothesized to be strongly beneficial, like PB2  
505 627K and HA 238L, remained low-frequency during infection. These mutations could have  
506 arisen late in infection or been linked to deleterious mutations. Additionally, epistasis is crucial to

507 influenza evolution, and mutations that promote human adaptation in one background may not  
508 be well-tolerated in others. PB2 E627K is widespread among clade 2.2.1 H5N1 viruses, but only  
509 sparsely detected in other H5N1 clades. Soh et al.<sup>52</sup> recently uncovered strongly human-  
510 adapting PB2 mutations that are rare in nature, likely because they are inaccessible via single  
511 site mutations. Genetic background plays a vital role in determining how AIVs evolve, and may  
512 at least partially explain our findings. Importantly, our study involves a small number of samples  
513 from a single geographic location, and two H5N1 clades. Continued characterization of H5N1  
514 spillover in other clades is necessary to define whether our observations are generalizable  
515 across H5N1 outbreaks.

516

517 Assessing zoonotic risk is critical but challenging. By quantifying within-host selection,  
518 identifying mutations at adaptive sites, measuring convergent evolution, and comparing within-  
519 host diversity to long-term evolution, we can assemble a nuanced understanding of AIV  
520 evolution. These methods provide a foundation for understanding cross-species transmission  
521 that can readily be applied to other avian influenza datasets, as well as newly emerging  
522 zoonotic viruses.

523

## 524 **References**

- 525 1. Organization, W. H. *Cumulative number of confirmed human cases for avian influenza*  
526 *A(H5N1) reported to WHO, 2003-2018.*
- 527 2. Chen, H. *et al.* Establishment of multiple sublineages of H5N1 influenza virus in Asia:  
528 Implications for pandemic control. *Proceedings of the National Academy of Sciences*  
529 (2006). doi:10.1073/pnas.0511120103
- 530 3. Nguyen, D. T. *et al.* Shifting Clade Distribution, Reassortment, and Emergence of New

- 531 Subtypes of Highly Pathogenic Avian Influenza A(H5) Viruses Collected from Vietnamese  
532 Poultry from 2012 to 2015. *J. Virol.* (2017). doi:10.1128/JVI.01708-16
- 533 4. Horm, S. V. *et al.* Intense circulation of A/H5N1 and other avian influenza viruses in  
534 Cambodian live-bird markets with serological evidence of sub-clinical human infections.  
535 *Emerg. Microbes Infect.* (2016). doi:10.1038/emi.2016.69
- 536 5. Nobusawa, E. & Sato, K. Comparison of the Mutation Rates of Human Influenza A and B  
537 Viruses. *J. Virol.* **80**, 3675–3678 (2006).
- 538 6. Parvin, J. D., Moscona, A., Pan, W. T., Leider, J. M. & Palese, P. Measurement of the  
539 mutation rates of animal viruses: influenza A virus and poliovirus type 1. *J. Virol.* **59**, 377–  
540 383 (1986).
- 541 7. Pauly, M. D., Procario, M. C. & Luring, A. S. A novel twelve class fluctuation test reveals  
542 higher than expected mutation rates for influenza A viruses. *Elife* **6**, (2017).
- 543 8. Suárez, P., Valcárcel, J. & Ortín, J. Heterogeneity of the mutation rates of influenza A  
544 viruses: isolation of mutator mutants. *J. Virol.* **66**, 2491–2494 (1992).
- 545 9. Baccam, P., Beauchemin, C., Macken, C. A., Hayden, F. G. & Perelson, A. S. Kinetics of  
546 influenza A virus infection in humans. *J. Virol.* **80**, 7590–7599 (2006).
- 547 10. Imai, M. *et al.* Experimental adaptation of an influenza H5 HA confers respiratory droplet  
548 transmission to a reassortant H5 HA/H1N1 virus in ferrets. *Nature* **486**, 420–428 (2012).
- 549 11. Linster, M. *et al.* Identification, Characterization, and Natural Selection of Mutations Driving  
550 Airborne Transmission of A/H5N1 Virus. *Cell* **157**, 329–339 (2014).
- 551 12. Herfst, S. *et al.* Airborne transmission of influenza A/H5N1 virus between ferrets. *Science*  
552 **336**, 1534–1541 (2012).
- 553 13. Wilker, P. R. *et al.* Selection on haemagglutinin imposes a bottleneck during mammalian  
554 transmission of reassortant H5N1 influenza viruses. *Nat. Commun.* **4**, 2636 (2013).
- 555 14. Russell, C. A. *et al.* The Potential for Respiratory Droplet–Transmissible A/H5N1 Influenza

- 556 Virus to Evolve in a Mammalian Host. *Science* **336**, 1541–1547 (2012).
- 557 15. Sigal, D., Reid, J. N. S. & Wahl, L. M. Effects of Transmission Bottlenecks on the Diversity  
558 of Influenza A Virus. *Genetics* **210**, 1075–1088 (2018).
- 559 16. Imai, H. *et al.* Diversity of Influenza A(H5N1) Viruses in Infected Humans, Northern  
560 Vietnam, 2004–2010. *Emerg. Infect. Dis.* **24**, 1128–1238 (2018).
- 561 17. Welkers, M. R. A. *et al.* Genetic diversity and host adaptation of avian H5N1 influenza  
562 viruses during human infection. *Emerg. Microbes Infect.* **8**, 262–271 (2019).
- 563 18. Milani, A. *et al.* Viral population diversity in vaccinated poultry host infected with H5N1  
564 highly pathogenic avian influenza virus. *Int. J. Infect. Dis.* **53**, 104 (2016).
- 565 19. Iqbal, M. *et al.* Within-host variation of avian influenza viruses. *Philos. Trans. R. Soc. Lond.*  
566 *B Biol. Sci.* **364**, 2739–2747 (2009).
- 567 20. Gutiérrez, R. A., Viari, A., Godelle, B. & Buchy, P. Biased mutational pattern and  
568 quasispecies hypothesis in H5N1 virus. *Infect. Genet. Evol.* **15**, 69–76 (2013).
- 569 21. Rith, S. *et al.* Identification of Molecular Markers Associated with Alteration of Receptor-  
570 Binding Specificity in a Novel Genotype of Highly Pathogenic Avian Influenza A(H5N1)  
571 Viruses Detected in Cambodia in 2013. *J. Virol.* **88**, 13897–13909 (2014).
- 572 22. Horwood, P. F. *et al.* Co-circulation of Influenza A H5, H7, and H9 Viruses and Co-infected  
573 Poultry in Live Bird Markets, Cambodia. *Emerg. Infect. Dis.* **24**, 352–355 (2018).
- 574 23. Bolger, A. M., Lohse, M. & Usadel, B. Trimmomatic: a flexible trimmer for Illumina  
575 sequence data. *Bioinformatics* **30**, 2114–2120 (2014).
- 576 24. Langmead, B. & Salzberg, S. L. Fast gapped-read alignment with Bowtie 2. *Nat. Methods*  
577 **9**, 357–359 (2012).
- 578 25. Li, H. *et al.* The Sequence Alignment/Map format and SAMtools. *Bioinformatics* **25**, 2078–  
579 2079 (2009).
- 580 26. Koboldt, D. C. *et al.* VarScan: variant detection in massively parallel sequencing of



- 581 individual and pooled samples. *Bioinformatics* **25**, 2283–2285 (2009).
- 582 27. Koboldt, D. C. *et al.* VarScan 2: somatic mutation and copy number alteration discovery in  
583 cancer by exome sequencing. *Genome Res.* **22**, 568–576 (2012).
- 584 28. Elbe, S. & Buckland-Merrett, G. Data, disease and diplomacy: GISAID’s innovative  
585 contribution to global health. *Global Challenges* **1**, 33–46 (2017).
- 586 29. Shu, Y. & McCauley, J. GISAID: Global initiative on sharing all influenza data – from vision  
587 to reality. *Eurosurveillance* **22**, 30494 (2017).
- 588 30. Zhang, Y. *et al.* Influenza Research Database: An integrated bioinformatics resource for  
589 influenza virus research. *Nucleic Acids Res.* **45**, D466–D474 (2017).
- 590 31. Hadfield, J. *et al.* Nextstrain: real-time tracking of pathogen evolution. *Bioinformatics* **34**,  
591 4121–4123 (2018).
- 592 32. Katoh, K., Misawa, K., Kuma, K. K.-I. & Miyata, T. MAFFT: a novel method for rapid  
593 multiple sequence alignment based on fast Fourier transform. *Nucleic Acids Res.* **30**, 3059–  
594 3066 (2002).
- 595 33. Nguyen, L.-T., Schmidt, H. A., von Haeseler, A. & Minh, B. Q. IQ-TREE: a fast and effective  
596 stochastic algorithm for estimating maximum-likelihood phylogenies. *Mol. Biol. Evol.* **32**,  
597 268–274 (2015).
- 598 34. Chernomor, O., von Haeseler, A. & Minh, B. Q. Terrace Aware Data Structure for  
599 Phylogenomic Inference from Supermatrices. *Syst. Biol.* **65**, 997–1008 (2016).
- 600 35. Sagulenko, P., Puller, V. & Neher, R. A. TreeTime: Maximum-likelihood phylodynamic  
601 analysis. *Virus Evolution* **4**, (2018).
- 602 36. Nelson, C. W., Moncla, L. H. & Hughes, A. L. SNPGenie: estimating evolutionary  
603 parameters to detect natural selection using pooled next-generation sequencing data.  
604 *Bioinformatics* **31**, 3709–3711 (2015).
- 605 37. Nei, M. & Gojobori, T. Simple methods for estimating the numbers of synonymous and

- 606 nonsynonymous nucleotide substitutions. *Mol. Biol. Evol.* **3**, 418–426 (1986).
- 607 38. Sorn, S. *et al.* Dynamic of H5N1 virus in Cambodia and emergence of a novel endemic  
608 sub-clade. *Infect. Genet. Evol.* **15**, 87–94 (2013).
- 609 39. Yamada, S. *et al.* Haemagglutinin mutations responsible for the binding of H5N1 influenza  
610 A viruses to human-type receptors. *Nature* **444**, 378–382 (2006).
- 611 40. Yang, Z.-Y. *et al.* Immunization by avian H5 influenza hemagglutinin mutants with altered  
612 receptor binding specificity. *Science* **317**, 825–828 (2007).
- 613 41. Wang, M. *et al.* Residue Y161 of influenza virus hemagglutinin is involved in viral  
614 recognition of sialylated complexes from different hosts. *J. Virol.* **86**, 4455–4462 (2012).
- 615 42. Suguitan, A. L. *et al.* The multibasic cleavage site of the hemagglutinin of highly pathogenic  
616 A/Vietnam/1203/2004 (H5N1) avian influenza virus acts as a virulence factor in a host-  
617 specific manner in mammals. *J. Virol.* **86**, 2706–2714 (2012).
- 618 43. Schrauwen, E. J. A. *et al.* The multibasic cleavage site in H5N1 virus is critical for systemic  
619 spread along the olfactory and hematogenous routes in ferrets. *J. Virol.* **86**, 3975–3984  
620 (2012).
- 621 44. Zhou, H. *et al.* The Special Neuraminidase Stalk-Motif Responsible for Increased Virulence  
622 and Pathogenesis of H5N1 Influenza A Virus. *PLoS One* **4**, e6277 (2009).
- 623 45. Zhou, H., Jin, M., Chen, H., Huag, Q. & Yu, Z. Genome-sequenee Analysis of the  
624 Pathogenic H5N1 Avian Influenza A Virus Isolated in China in 2004. *Virus Genes* **32**, 85–95  
625 (2006).
- 626 46. Matsuoka, Y. *et al.* Neuraminidase Stalk Length and Additional Glycosylation of the  
627 Hemagglutinin Influence the Virulence of Influenza H5N1 Viruses for Mice. *J. Virol.* **83**,  
628 4704–4708 (2009).
- 629 47. Hatta, M., Gao, P., Halfmann, P. & Kawaoka, Y. Molecular basis for high virulence of Hong  
630 Kong H5N1 influenza A viruses. *Science* **293**, 1840–1842 (2001).

- 631 48. Subbarao, E. K., Kawaoka, Y. & Murphy, B. R. Rescue of an influenza A virus wild-type  
632 PB2 gene and a mutant derivative bearing a site-specific temperature-sensitive and  
633 attenuating mutation. *J. Virol.* **67**, 7223–7228 (1993).
- 634 49. Le, Q. M., Sakai-Tagawa, Y., Ozawa, M., Ito, M. & Kawaoka, Y. Selection of H5N1  
635 influenza virus PB2 during replication in humans. *J. Virol.* **83**, 5278–5281 (2009).
- 636 50. Gabriel, G. *et al.* The viral polymerase mediates adaptation of an avian influenza virus to a  
637 mammalian host. *Proc. Natl. Acad. Sci. U. S. A.* **102**, 18590–18595 (2005).
- 638 51. Steel, J., Lowen, A. C., Mubareka, S. & Palese, P. Transmission of Influenza Virus in a  
639 Mammalian Host Is Increased by PB2 Amino Acids 627K or 627E/701N. *PLoS Pathog.* **5**,  
640 e1000252 (2009).
- 641 52. Soh, Y. Q. S., Moncla, L. H., Eguia, R., Bedford, T. & Bloom, J. D. Comprehensive mapping  
642 of adaptation of the avian influenza polymerase protein PB2 to humans. *Elife* **8**, (2019).
- 643 53. Auewarakul, P. *et al.* An avian influenza H5N1 virus that binds to a human-type receptor. *J.*  
644 *Virol.* **81**, 9950–9955 (2007).
- 645 54. Naughtin, M. *et al.* Neuraminidase inhibitor sensitivity and receptor-binding specificity of  
646 Cambodian clade 1 highly pathogenic H5N1 influenza virus. *Antimicrob. Agents*  
647 *Chemother.* **55**, 2004–2010 (2011).
- 648 55. Lyons, D. M. & Luring, A. S. *Mutation and epistasis in influenza virus evolution.* *Viruses*  
649 **10**, (2018).
- 650 56. Visher, E., Whitefield, S. E., McCrone, J. T., Fitzsimmons, W. & Luring, A. S. The  
651 Mutational Robustness of Influenza A Virus. *PLoS Pathog.* **12**, e1005856 (2016).
- 652 57. Watanabe, Y. *et al.* Acquisition of Human-Type Receptor Binding Specificity by New H5N1  
653 Influenza Virus Sublineages during Their Emergence in Birds in Egypt. *PLoS Pathog.* **7**,  
654 e1002068 (2011).
- 655 58. Treanor, J., Perkins, M., Battaglia, R. & Murphy, B. R. Evaluation of the genetic stability of

- 656 the temperature-sensitive PB2 gene mutation of the influenza A/Ann Arbor/6/60 cold-  
657 adapted vaccine virus. *J. Virol.* **68**, 7684–7688 (1994).
- 658 59. Guilligay, D. *et al.* The structural basis for cap binding by influenza virus polymerase  
659 subunit PB2. *Nat. Struct. Mol. Biol.* **15**, 500–506 (2008).
- 660 60. Nerome, R. *et al.* Evolutionary characterization of the six internal genes of H5N1 human  
661 influenza A virus. *J. Gen. Virol.* **81**, 1293–1303 (2000).
- 662 61. Xu, L. *et al.* Genomic Polymorphism of the Pandemic A (H1N1) Influenza Viruses  
663 Correlates with Viral Replication, Virulence, and Pathogenicity In Vitro and In Vivo. *PLoS*  
664 *One* **6**, e20698 (2011).
- 665 62. Bussey, K. A. *et al.* PA Residues in the 2009 H1N1 Pandemic Influenza Virus Enhance  
666 Avian Influenza Virus Polymerase Activity in Mammalian Cells. *J. Virol.* **85**, 7020–7028  
667 (2011).
- 668 63. Hiromoto, Y., Saito, T., Lindstrom, S. & Nerome, K. Characterization of Low Virulent Strains  
669 of Highly Pathogenic A/Hong Kong/156/97 (H5N1) Virus in Mice after Passage in  
670 Embryonated Hens' Eggs. *Virology* **272**, 429–437 (2000).
- 671 64. Webster, R. G. *et al.* Structure of antigenic sites on the haemagglutinin molecule of H5  
672 avian influenza virus and phenotypic variation of escape mutants. *J. Gen. Virol.* **83**, 2497–  
673 2505 (2002).
- 674 65. Yen, H.-L. *et al.* Changes in H5N1 influenza virus hemagglutinin receptor binding domain  
675 affect systemic spread. *Proc. Natl. Acad. Sci. U. S. A.* **106**, 286–291 (2009).
- 676 66. Stevens, J. *et al.* Recent Avian H5N1 Viruses Exhibit Increased Propensity for Acquiring  
677 Human Receptor Specificity. *J. Mol. Biol.* **381**, 1382–1394 (2008).
- 678 67. Wang, W. *et al.* Glycosylation at 158N of the hemagglutinin protein and receptor binding  
679 specificity synergistically affect the antigenicity and immunogenicity of a live attenuated  
680 H5N1 A/Vietnam/1203/2004 vaccine virus in ferrets. *J. Virol.* **84**, 6570–6577 (2010).

- 681 68. Chutinimitkul, S. *et al.* In vitro assessment of attachment pattern and replication efficiency  
682 of H5N1 influenza A viruses with altered receptor specificity. *J. Virol.* **84**, 6825–6833  
683 (2010).
- 684 69. Stevens, J. *et al.* Structure and receptor specificity of the hemagglutinin from an H5N1  
685 influenza virus. *Science* **312**, 404–410 (2006).
- 686 70. Maines, T. R. *et al.* Effect of receptor binding domain mutations on receptor binding and  
687 transmissibility of avian influenza H5N1 viruses. *Virology* **413**, 139–147 (2011).
- 688 71. Chen, L.-M. *et al.* In vitro evolution of H5N1 avian influenza virus toward human-type  
689 receptor specificity. *Virology* **422**, 105–113 (2012).
- 690 72. Weber, F., Kochs, G., Gruber, S. & Haller, O. A Classical Bipartite Nuclear Localization  
691 Signal on Thogoto and Influenza A Virus Nucleoproteins. *Virology* **250**, 9–18 (1998).
- 692 73. Grantham, M. L. *et al.* Palmitoylation of the influenza A virus M2 protein is not required for  
693 virus replication in vitro but contributes to virus virulence. *J. Virol.* **83**, 8655–8661 (2009).
- 694 74. Holsinger, L. J., Shaughnessy, M. A., Micko, A., Pinto, L. H. & Lamb, R. A. Analysis of the  
695 posttranslational modifications of the influenza virus M2 protein. *J. Virol.* **69**, 1219–1225  
696 (1995).
- 697 75. Li, Y., Yamakita, Y. & Krug, R. M. Regulation of a nuclear export signal by an adjacent  
698 inhibitory sequence: The effector domain of the influenza virus NS1 protein. *Proceedings of*  
699 *the National Academy of Sciences* **95**, 4864–4869 (1998).
- 700 76. Hale, B. G., Barclay, W. S., Randall, R. E. & Russell, R. J. Structure of an avian influenza A  
701 virus NS1 protein effector domain. *Virology* **378**, 1–5 (2008).
- 702 77. Imai, H. *et al.* The HA and NS Genes of Human H5N1 Influenza A Virus Contribute to High  
703 Virulence in Ferrets. *PLoS Pathog.* **6**, e1001106 (2010).
- 704

705 **Acknowledgments**

706 We would like to thank Katherine Xue for her careful reading and comments on the manuscript.

707

708 **Author contributions**

709 LHM, TB, PD, PB, TCF, and PFH contributed the conception and design of the experiments. PD,

710 SVH, SR, PB, EAK, LL, YL, HZ, YG, and PFH acquired samples and generated data. LHM, TB,

711 TCF, and PFH analyzed and interpreted data. LHM, TB, EAK, TCF, and PFH wrote the

712 manuscript.

713

714 **Competing interests**

715 Dr. Philippe Buchy is a former Head of Virology at Institut Pasteur du Cambodge and is currently

716 an employee of GSK Vaccines, Singapore. The other authors declare no conflict of interest.

717

718 **Funding statement**

719 The study was funded by the US Agency for International Development (grant No. AID-442-G-

720 14-00005).

721

722 **Figure legends**

723 **Figure 1: Purifying selection, population growth, and randomness shape within-host**

724 **diversity in humans and ducks**

725 (a) Within-host polymorphisms present in at least 1% of sequencing reads were called in all

726 human (red) and duck (blue) samples. Each dot represents one unique single nucleotide variant

727 (SNV), the x-axis represents the nucleotide site of the SNV, and the y-axis represents its

728 frequency within-host. (b) For each sample in our dataset, we calculated the proportion of its

729 synonymous (light blue and light red) and nonsynonymous (dark blue and dark red) within-host

730 variants present at frequencies of 1-10%, 10-20%, 20-30%, 30-40%, and 40-50%. We then took  
731 the mean across all human (red) or duck (blue) samples. Bars represent the mean proportion of  
732 variants present in a particular frequency bin and error bars represent standard deviations. (c)  
733 For each sample and gene, we computed the number of nonsynonymous SNPs per  
734 nonsynonymous site, and the number of synonymous SNPs per synonymous site. We then  
735 calculated the mean for each gene and species. Each bar represents the mean and error bars  
736 represent the standard deviation. Human values are shown in red and duck values are shown in  
737 blue.

738

### 739 **Figure 2: Mutations are present at functionally relevant sites.**

740 We queried each amino acid changing mutation identified in our dataset against all known  
741 annotations present in the Influenza Research Database Sequence Feature Variant Types tool.  
742 Each mutation is colored according to its function. Shape represents whether the mutation was  
743 identified in a human (circle) or duck (square) sample. Mutations shown here were detected in  
744 at least 1 human or duck sample. Filled in shapes represent nonsynonymous changes and open  
745 shapes represent synonymous mutations. Grey, transparent dots represent mutations for which  
746 no host-related function was known. Each nonsynonymous colored mutation, its frequency, and  
747 its phenotypic effect is shown in Table 2, and a full list of all mutations and their annotations are  
748 available in **Supplementary Table 2**.

749

### 750 **Figure 3: Humans and ducks share more polymorphisms than expected by chance**

751 (a) All amino acid sites that were polymorphic in at least 2 samples are shown. This includes  
752 sites at which each sample had a polymorphism at the same site, but encoded different variant  
753 amino acids. There are 3 amino acid sites that are shared by at least 2 duck samples, and 9  
754 polymorphic sites shared by at least 2 human samples. 3 synonymous changes are detected in

755 both human and duck samples (PB1 371, PA 397, and NP 201). Frequency is shown on the y-  
756 axis. (b) To test whether the level of sharing we observed was more or less than expected by  
757 chance, we performed a permutation test. The x-axis represents the number of sites shared by  
758 at least 2 ducks (blue) or at least 2 humans (red), and the bar height represents the number of  
759 simulations in which that number of shared sites occurred. Actual observed number of shared  
760 sites (3 and 9) are shown with a dashed line. (c) The same permutation test as shown in (b),  
761 except that only 70% of available amino acid sites were permitted to mutate. (d) The same  
762 permutation test as shown in (b), except that only 50% of available amino acid sites were  
763 permitted to mutate.

764

#### 765 **Figure 4: A small subset of within-host variants are enriched on spillover branches**

766 (a) A schematic for how we classified host transitions along the phylogeny. Branches within  
767 monophyletic human clades were labelled “human to human” (red branches). Branches leading  
768 to a monophyletic human clade, whose parent node had avian children were labelled as “avian  
769 to human” (half red, half blue branches labelled “A -> H”), and all other branches were labelled  
770 “avian to avian” (blue branches). (b) Each amino acid-changing SNV we detected within-host in  
771 either ducks (left) or humans (right) that was present in the H5N1 phylogeny is displayed. Each  
772 bar represents an amino acid mutation, and its height represents the number of avian to avian  
773 (blue) or avian/human to human (red) transitions in which this mutation was present along the  
774 H5N1 phylogeny. Avian/human to human transitions includes both avian-to-human and human-  
775 to-human transitions summed together. Significance was assessed with a Fisher’s exact test. \*  
776 indicates  $p < 0.05$ , \*\*\*\* indicates  $p < 0.0001$ .

777

#### 778 **Supplementary Figure 1: Genome coverage**



779 The mean coverage depth at each nucleotide site (x-axis) for each gene across our 8 human  
780 and 5 duck samples is shown. Solid black lines represent the mean coverage across samples,  
781 and the grey shaded area represents the standard deviation of coverage depth across samples.

782

### 783 **Supplementary Figure 2: Phylogenetic placement of H5N1 samples from Cambodia**

784 All currently available H5N1 sequences were downloaded from the Influenza Research  
785 Database and the Global Initiative on Sharing All Influenza Data and used to generate full  
786 genome phylogenies using Nextstrain's augur pipeline. Colors represent the geographic region  
787 in which the sample was collected and x-axis position indicates the date of sample collection  
788 (for tips) or the inferred time to the most recent common ancestor (for internal nodes). H5N1  
789 viruses from Cambodia selected for within-host analysis are indicated by green circles with  
790 black outlines. All HA and NA sequences in this dataset, besides  
791 A/duck/Cambodia/Y0224304/2014, belong to clade 1.1.2. Internal genes from samples collected  
792 prior to 2013 belong to clade 1.1.2, while internal genes from samples collected in 2013 or later  
793 belong to clade 2.3.2.1a.

794

### 795 **Supplementary Figure 3: All within-host variants detected in our dataset**

796 All within-host variants detected in our study are shown. Each row represents one sample and  
797 each column represents one gene. The x-axis shows the nucleotide site and the y-axis shows  
798 the frequency that the variant was detected within-host. Filled circles represent nonsynonymous  
799 changes, while open circles represent synonymous changes. Green dots represent variants  
800 identified within duck samples, while maroon dots represent variants identified in human  
801 samples. Blank plots indicate that no variants were identified in that sample and gene.

802

803 **Tables**804 **Table 1: Sample information**

| Sample ID                     | Host              | Sample type                    | Collection                     | Date           | Days post-symptom onset | vRNA copies/ $\mu$ l | Clade                      |
|-------------------------------|-------------------|--------------------------------|--------------------------------|----------------|-------------------------|----------------------|----------------------------|
| A/duck/Cambodia/PV027D1/2010  | Domestic duck     | Pooled organs                  | Poultry outbreak investigation | April 2010     | NA                      | $5.45 \times 10^6$   | 1.1.2                      |
| A/duck/Cambodia/083D1/2011    | Domestic duck     | Pooled organs                  | Poultry outbreak investigation | September 2011 | NA                      | $3.74 \times 10^7$   | 1.1.2                      |
| A/duck/Cambodia/381W11M4/2013 | Domestic duck     | Pooled throat and cloacal swab | Live bird market surveillance  | March 2013     | NA                      | $7.37 \times 10^5$   | 1.1.2/2.3.2.1a reassortant |
| A/duck/Cambodia/Y0224301/2014 | Domestic duck     | Pooled organs                  | Poultry outbreak investigation | February 2014  | NA                      | $2.0 \times 10^5$    | 1.1.2/2.3.2.1a reassortant |
| A/duck/Cambodia/Y0224304/2014 | Domestic duck     | Pooled organs                  | Poultry outbreak investigation | February 2014  | NA                      | $5.0 \times 10^6$    | 1.1.2/2.3.2.1a reassortant |
| A/Cambodia/V0401301/2011      | Human (10F, died) | Throat swab                    | Event-based surveillance       | April 2011     | 9                       | $5.02 \times 10^3$   | 1.1.2                      |

|                          |                  |             |                          |               |    |                    |                            |
|--------------------------|------------------|-------------|--------------------------|---------------|----|--------------------|----------------------------|
| A/Cambodia/V0417301/2011 | Human (5F, died) | Throat swab | Event-based surveillance | April 2011    | 5  | $8.98 \times 10^4$ | 1.1.2                      |
| A/Cambodia/W0112303/2012 | Human (2M, died) | Throat swab | Event-based surveillance | January 2012  | 7  | $2.05 \times 10^3$ | 1.1.2                      |
| A/Cambodia/X0125302/2013 | Human (1F, died) | Throat swab | Event-based surveillance | January 2013  | 12 | $6.84 \times 10^4$ | 1.1.2/2.3.2.1a reassortant |
| A/Cambodia/X0128304/2013 | Human (9F, died) | Throat swab | Event-based surveillance | January 2013  | 8  | $5.09 \times 10^3$ | 1.1.2/2.3.2.1a reassortant |
| A/Cambodia/X0207301/2013 | Human (5F, died) | Throat swab | Event-based surveillance | February 2013 | 12 | $1.73 \times 10^5$ | 1.1.2/2.3.2.1a reassortant |
| A/Cambodia/X0219301/2013 | Human (2M, died) | Throat swab | Event-based surveillance | February 2013 | 12 | $1.66 \times 10^3$ | 1.1.2/2.3.2.1a reassortant |
| A/Cambodia/X1030304/2013 | Human (2F, died) | Throat swab | Event-based surveillance | October 2013  | 8  | $1.08 \times 10^4$ | 1.1.2/2.3.2.1a reassortant |

805

806

807

808

809 **Table 2: Mutations identified at functionally relevant sites**

| Sample                   | Gene | Nt site | Ref base | Variant base | Coding region change | Frequency | Description                                                                    | Type                            |
|--------------------------|------|---------|----------|--------------|----------------------|-----------|--------------------------------------------------------------------------------|---------------------------------|
| A/Cambodia/X0125302/2013 | PB2  | 816     | A        | C            | N265H                | 2.82%     | Determinant of temperature sensitivity in an H3N2 virus <sup>58</sup> .        | replication                     |
| A/Cambodia/X0128304/2013 | PB2  | 1069    | A        | T            | N348Y                | 5.88%     | Putative m7GTP cap binding site <sup>59</sup> .                                | replication                     |
| A/Cambodia/V0401301/2011 | PB2  | 1115    | C        | T            | P363P                | 10%       | Putative m7GTP cap binding site <sup>59</sup> .                                | replication                     |
| A/Cambodia/V0401301/2011 | PB2  | 1202    | A        | C            | N392H                | 3.61%     | Putative m7GTP cap binding site <sup>59</sup> .                                | replication                     |
| A/Cambodia/W0112303/2012 | PB2  | 1891    | G        | A            | E627K                | 7.20%     | A Lys at 627 enhances mammalian replication <sup>47,48</sup> .                 | replication                     |
| A/Cambodia/X0125302/2013 | PB2  | 2022    | G        | A            | V667I                | 2.95%     | An Ile at 667 was associated with human-infecting H5N1 strains <sup>60</sup> . | replication                     |
| A/Cambodia/W0112303/2012 | PB2  | 2113    | A        | G            | N701D                | 16.26%    | An Asn at 701 enhances mammalian replication <sup>50,51</sup> .                | replication                     |
| A/Cambodia/X0125302/2013 | PB2  | 2163    | A        | G            | S714G                | 8.31%     | An Arg at 714 enhances mammalian replication <sup>50</sup> .                   | replication                     |
| A/Cambodia/X1030304/2013 | PB1  | 631     | A        | G            | R211G                | 1.89%     | Nuclear localization motif.                                                    | interaction with host machinery |

|                          |     |      |   |   |       |       |                                                                                                                     |                                 |
|--------------------------|-----|------|---|---|-------|-------|---------------------------------------------------------------------------------------------------------------------|---------------------------------|
| A/Cambodia/X1030304/2013 | PB1 | 643  | A | G | R215G | 1.91% | Nuclear localization motif.                                                                                         | interaction with host machinery |
| A/Cambodia/X0125302/2013 | PB1 | 1078 | A | G | K353R | 2.58% | An Arg at 353 is associated with higher replication and pathogenicity of an H1N1 pandemic strain <sup>61</sup> .    | replication                     |
| A/Cambodia/X0125302/2013 | PB1 | 1716 | A | T | T566S | 5.38% | An Ala at 566 is associated with higher replication and pathogenicity of an H1N1 pandemic virus <sup>61</sup> .     | replication                     |
| A/Cambodia/X0219301/2013 | PA  | 265  | A | G | T85A  | 2.36% | An Ile at 85 enhances polymerase activity of pandemic H1N1 in mammalian cells <sup>62</sup> .                       | replication                     |
| A/Cambodia/X0207301/2013 | PA  | 1903 | A | G | S631G | 1.90% | A Ser at 631 enhances virulence of H5N1 in mice <sup>63</sup> ..                                                    | virulence                       |
| A/Cambodia/X0128304/2013 | HA  | 299  | A | G | E91G  | 7.22% | A Lys at 91 enhances $\alpha$ -2,6 binding <sup>39</sup> . (H5 mature: 75)                                          | receptor binding                |
| A/Cambodia/V0417301/2011 | HA  | 425  | A | G | E142G | 2.51% | Putative glycosylation site <sup>64</sup> . (H5 mature: 126)                                                        | virulence                       |
| A/Cambodia/X1030304/2013 | HA  | 448  | G | A | A150T | 1.65% | A Val at 150 confers enhanced $\alpha$ -2,6 sialic acid binding in H5N1 viruses <sup>53,54</sup> . (H5 mature: 134) | receptor binding                |

|                          |    |     |   |   |       |        |                                                                                                                                                                                |                  |
|--------------------------|----|-----|---|---|-------|--------|--------------------------------------------------------------------------------------------------------------------------------------------------------------------------------|------------------|
| A/Cambodia/V0401301/2011 | HA | 449 | C | T | A150V | 20.24% | A Val at 150 confers enhanced $\alpha$ -2,6 sialic acid binding in H5N1 viruses <sup>53,54</sup> . (H5 mature: 134)                                                            | receptor binding |
| A/Cambodia/X0125302/2013 | HA | 449 | C | T | A150V | 15.17% | A Val at 150 confers enhanced $\alpha$ -2,6 sialic acid binding in H5N1 viruses <sup>53,54</sup> . (H5 mature: 134)                                                            | receptor binding |
| A/Cambodia/X0128304/2013 | HA | 542 | A | C | K172T | 11.11% | Part of putative glycosylation motif that improves $\alpha$ -2,6 binding <sup>65-67</sup> . (H5 mature: 156)                                                                   | receptor binding |
| A/Cambodia/V0401301/2011 | HA | 517 | T | C | Y173H | 5.04%  | Residue involved in sialic acid recognition <sup>41</sup> . (H5 mature: 157)                                                                                                   | receptor binding |
| A/Cambodia/V0401301/2011 | HA | 593 | A | G | N198S | 3.32%  | A Lys at 198 confers $\alpha$ -2,6 sialic acid binding <sup>39,68</sup> (H5 mature: 182)                                                                                       | receptor binding |
| A/Cambodia/X0128304/2013 | HA | 703 | A | G | T226A | 28.07% | An Ile at 226 enhanced $\alpha$ -2,6 sialic acid binding <sup>57</sup> . (H5 mature: 210)                                                                                      | receptor binding |
| A/Cambodia/V0401301/2011 | HA | 713 | A | T | N238L | 2.80%  | A Leu at 238 confers a switch from $\alpha$ -2,3 to $\alpha$ -2,6 sialic acid binding and is a determinant of mammalian transmission <sup>11,12,68-71</sup> . (H5 mature: 222) | receptor binding |
| A/Cambodia/V0417301/2011 | HA | 713 | A | T | N238L | 8.05%  | A Leu at 238 confers a switch from $\alpha$ -2,3 to $\alpha$ -2,6 sialic acid binding and is a determinant of mammalian transmission <sup>11,12,68-71</sup> . (H5 mature: 222) | receptor binding |

|                               |     |     |   |   |       |        |                                                                                                                                                                                |                                 |
|-------------------------------|-----|-----|---|---|-------|--------|--------------------------------------------------------------------------------------------------------------------------------------------------------------------------------|---------------------------------|
| A/Cambodia/X0125302/2013      | HA  | 713 | A | G | N238R | 37.29% | A Leu at 238 confers a switch from $\alpha$ -2,3 to $\alpha$ -2,6 sialic acid binding and is a determinant of mammalian transmission <sup>11,12,68-71</sup> . (H5 mature: 222) | receptor binding                |
| A/duck/Cambodia/Y0224304/2014 | NP  | 674 | C | T | T215I | 3.69%  | Nuclear targeting motif <sup>72</sup> .                                                                                                                                        | interaction with host machinery |
| A/Cambodia/X1030304/2013      | M2  | 861 | G | A | C50Y  | 1.88%  | A Cys at position 50 is a palmitoylation site that enhances virulence <sup>73,74</sup> .                                                                                       | virulence                       |
| A/Cambodia/X0128304/2013      | NS1 | 502 | C | T | P159L | 2.98%  | Part of the NS1 nuclear export signal mask <sup>75</sup> .                                                                                                                     | interaction with host machinery |
| A/duck/Cambodia/Y0224301/2014 | NS1 | 646 | T | C | L207P | 2.22%  | NS1 flexible tail, which interacts with host machinery <sup>76</sup> .                                                                                                         | interaction with host machinery |
| A/duck/Cambodia/Y0224301/2014 | NS1 | 654 | C | T | P210S | 2.55%  | NS1 flexible tail, which interacts with host machinery <sup>76</sup> .                                                                                                         | interaction with host machinery |
| A/Cambodia/X0207301/2013      | NEP | 609 | A | G | E47G  | 4.53%  | This site was implicated in enhanced virulence of H5N1 in ferrets <sup>77</sup> .                                                                                              | virulence                       |

810 All nonsynonymous mutations that were identified in sites with putative links to host-specific phenotypes are shown. We identify a  
811 handful of amino acid mutations that have been explicitly linked to mammalian adaptation of avian influenza viruses. For HA  
812 mutations, all mutations use native H5 numbering, including the signal peptide. For ease of comparison, the corresponding amino

813 acid number in mature, H5 peptide numbering is also provided in parentheses in the description column. Full annotations for all  
814 mutations in our data are shown in **Supplementary Table 2**.

815

816

817

818

819



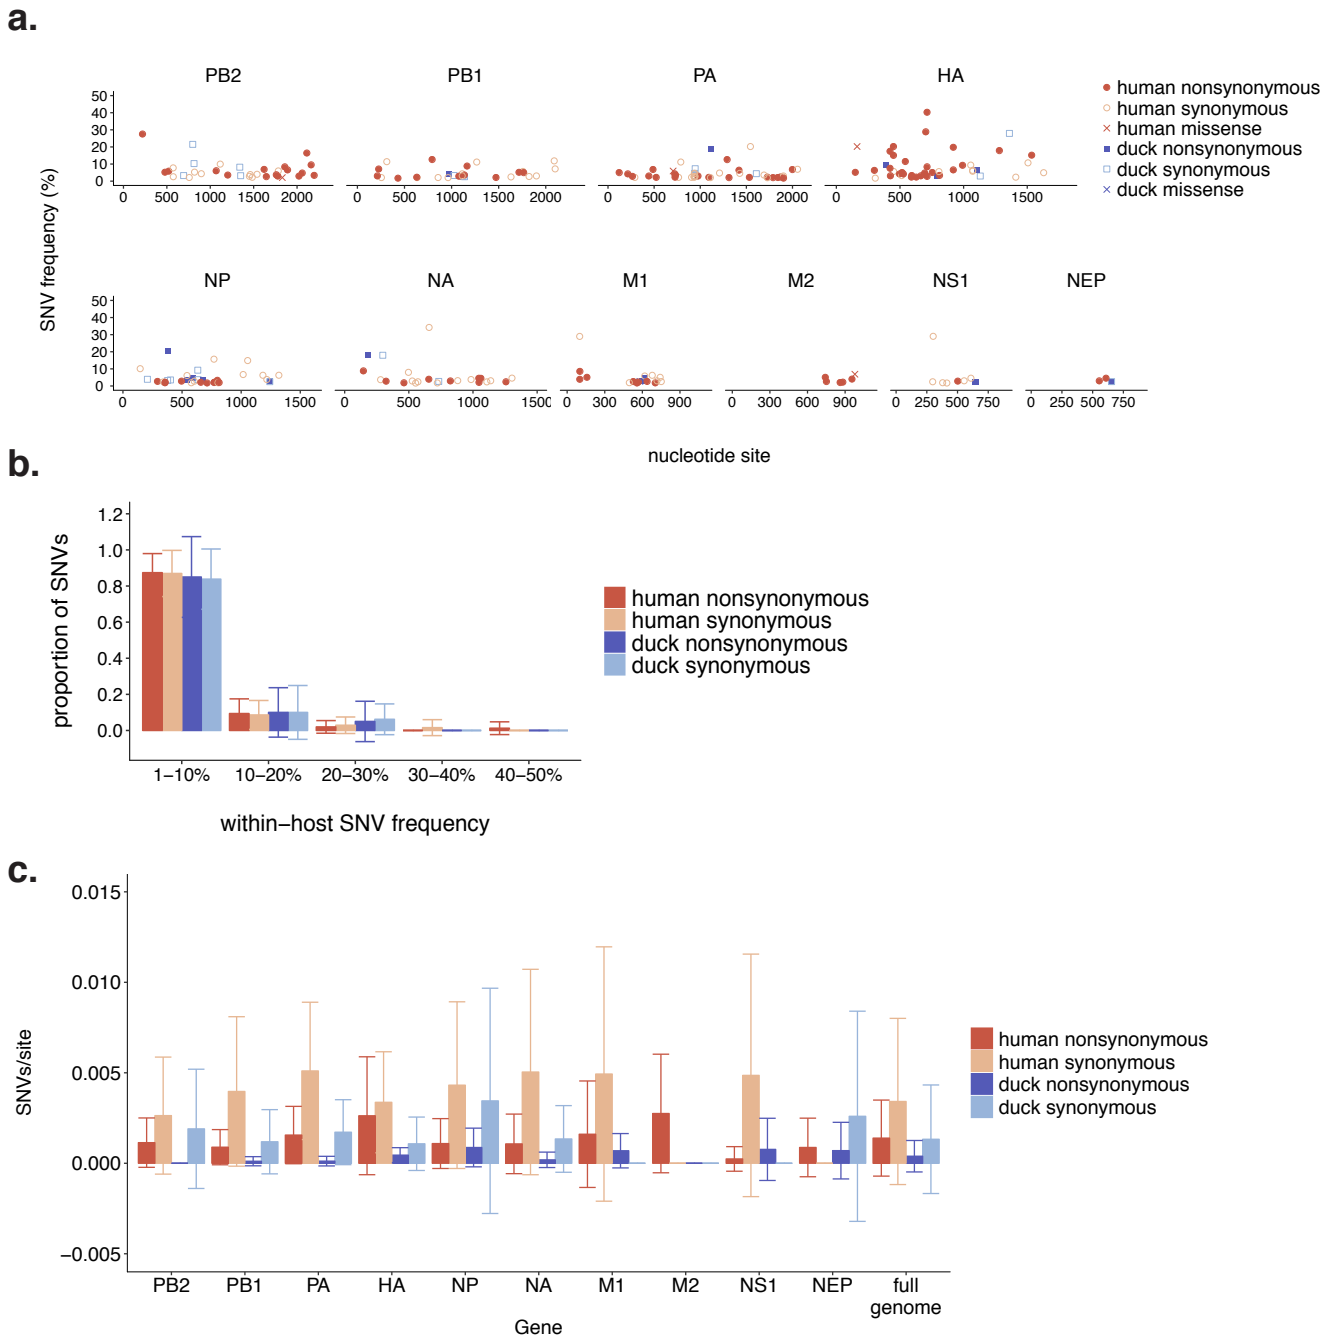

**Figure 1: Purifying selection, population growth, and randomness shape within-host diversity in humans and ducks**

**(a)** Within-host polymorphisms present in at least 1% of sequencing reads were called in all human (red) and duck (blue) samples. Each dot represents one unique single nucleotide variant (SNV), the x-axis represents the nucleotide site of the SNV, and the y-axis represents its frequency within-host. **(b)** For each sample in our dataset, we calculated the proportion of its synonymous (light blue and light red) and nonsynonymous (dark blue and dark red) within-host variants present at frequencies of 1-10%, 10-20%, 20-30%, 30-40%, and 40-50%. We then took the mean across all human (red) or duck (blue) samples. Bars represent the mean proportion of variants present in a particular frequency bin and error bars represent standard deviations. **(c)** For each sample and gene, we computed the number of nonsynonymous SNPs per nonsynonymous site, and the number of synonymous SNPs per synonymous site. We then calculated the mean for each gene and species. Each bar represents the mean and error bars represent the standard deviation. Human values are shown in red and duck values are shown in blue.

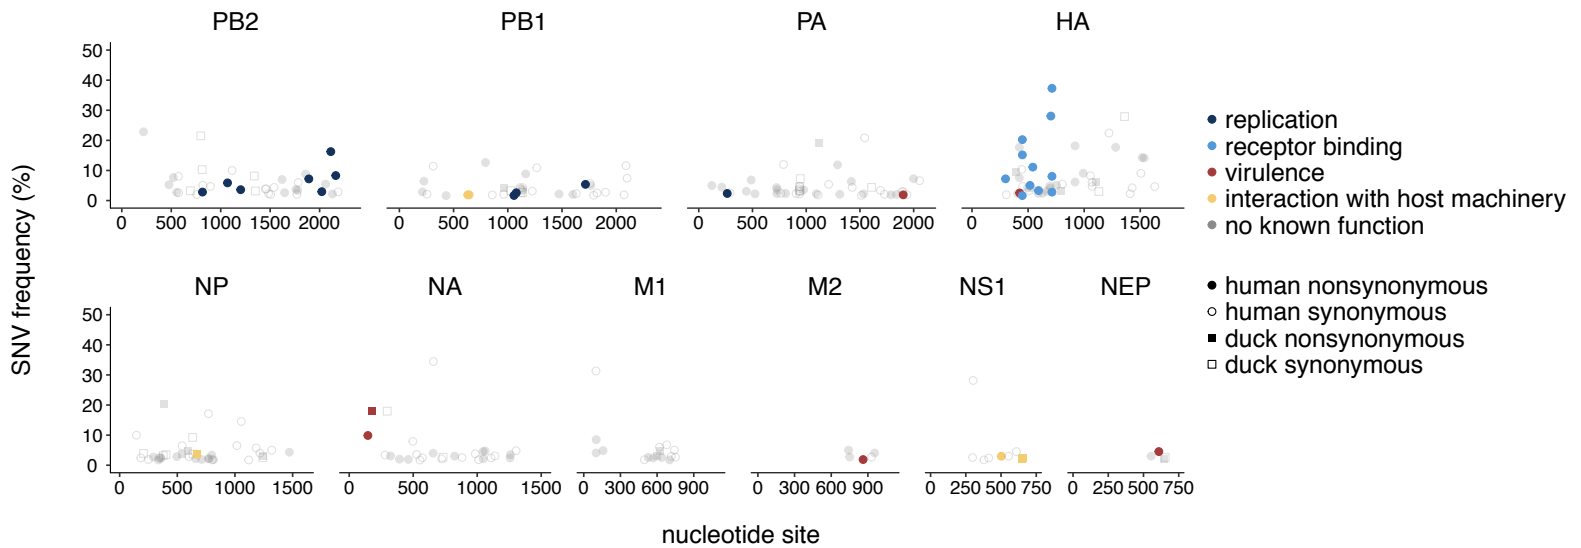

## Figure 2: Mutations are present at functionally relevant sites.

We queried each amino acid changing mutation identified in our dataset against all known annotations present in the Influenza Research Database Sequence Feature Variant Types tool. Each mutation is colored according to its function. Shape represents whether the mutation was identified in a human (circle) or duck (square) sample. Mutations shown here were detected in at least 1 human or duck sample. Filled in shapes represent nonsynonymous changes and open shapes represent synonymous mutations. Grey, transparent dots represent mutations for which no host-related function was known. Each nonsynonymous colored mutation, its frequency, and its phenotypic effect is shown in Table 2, and a full list of all mutations and their annotations are available in Supplementary Table 2.

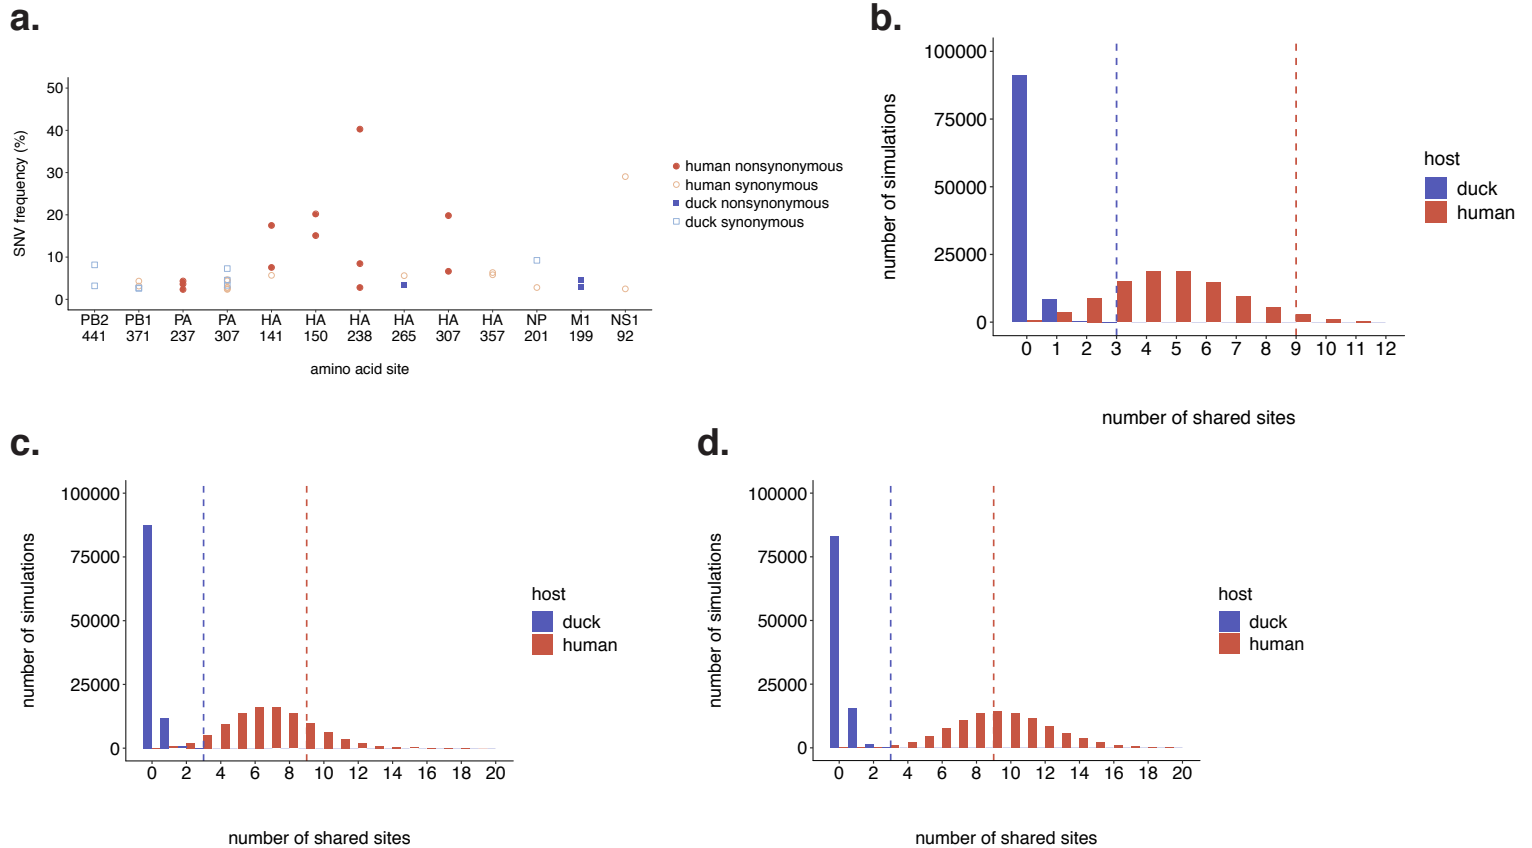

### Figure 3: Humans and ducks share more polymorphisms than expected by chance

**(a)** All amino acid sites that were polymorphic in at least 2 samples are shown. This includes sites at which each sample had a polymorphism at the same site, but encoded different variant amino acids. There are 3 amino acid sites that are shared by at least 2 duck samples, and 9 polymorphic sites shared by at least 2 human samples. 3 synonymous changes are detected in both human and duck samples (PB1 371, PA 397, and NP 201). Frequency is shown on the y-axis. **(b)** To test whether the level of sharing we observed was more or less than expected by chance, we performed a permutation test. The x-axis represents the number of sites shared by at least 2 ducks (blue) or at least 2 humans (red), and the bar height represents the number of simulations in which that number of shared sites occurred. Actual observed number of shared sites (3 and 9) are shown with a dashed line. **(c)** The same permutation test as shown in **(b)**, except that only 70% of available amino acid sites were permitted to mutate. **(d)** The same permutation test as shown in **(b)**, except that only 50% of available amino acid sites were permitted to mutate.

a.

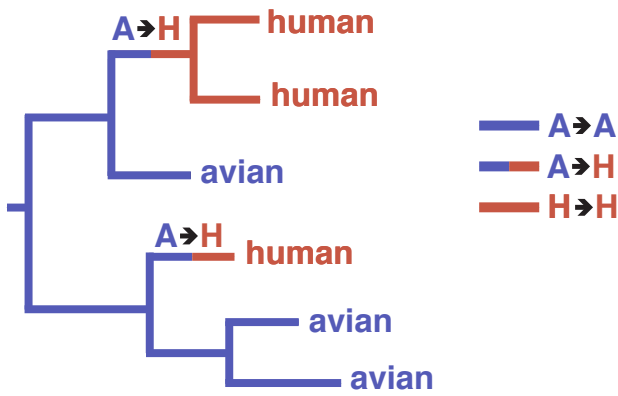

b.

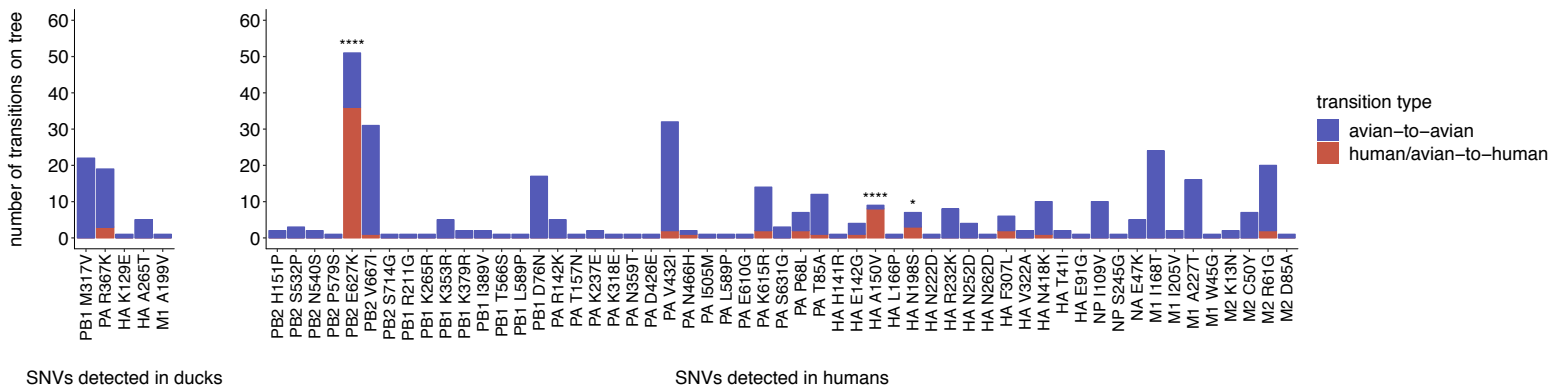

#### Figure 4: A small subset of within-host variants are enriched on spillover branches

(a) A schematic for how we classified host transitions along the phylogeny. Branches within monophyletic human clades were labelled “human to human” (red branches). Branches leading to a monophyletic human clade, whose parent node had avian children were labelled as “avian to human” (half red, half blue branches labelled “A -> H”), and all other branches were labelled “avian to avian” (blue branches). (b) Each amino acid-changing SNV we detected within-host in either ducks (left) or humans (right) that was present in the H5N1 phylogeny is displayed. Each bar represents an amino acid mutation, and its height represents the number of avian to avian (blue) or avian/human to human (red) transitions in which this mutation was present along the H5N1 phylogeny. Avian/human to human transitions includes both avian-to-human and human-to-human transitions summed together. Significance was assessed with a Fisher’s exact test. \* indicates  $p < 0.05$ , \*\*\*\* indicates  $p < 0.0001$ .
